# Supplementary material
Source: Springer Nature journal article supplement (https://www.springermedizin.de/resource/supplementary/12875_2013_1043_MOESM4_ESM.pdf/9436022)
Supplement: MOESM4 [file 9436022]

Total Number of Respondents to Survey (n=95)

Practices undertaking ABI measurement (73% n=69)

Practices not undertaking ABI measurement (27% n=26)

Analysis of ABI methodology (n=64) (missing or incomplete methodology data for 5 responses)

Referred to Secondary Care (16% n=15)

Referred to District Nurse Team not based within General Practice (11% n=11)

| Points of ABI methodology assessed                                                                                             | Correct Responses                            | Incorrect Responses                                                                                                                                                                                                                   |
|--------------------------------------------------------------------------------------------------------------------------------|----------------------------------------------|---------------------------------------------------------------------------------------------------------------------------------------------------------------------------------------------------------------------------------------|
| 1. Patient rested for at least 10 minutes prior to ABI measurement?                                                            | Yes (n=52)                                   | No (n=11)<br>Reason:<br><ul style="list-style-type: none"> <li>Lack of time (n=8)</li> <li>Not considered necessary (n=3)</li> </ul>                                                                                                  |
| 2. Equipment used for measurement of brachial systolic blood pressure?                                                         | Sphygmomanometer & Doppler Ultrasound (n=46) | <ul style="list-style-type: none"> <li>Automated blood pressure monitor (n=2)</li> <li>Stethoscope (Korotkoff method) (n=4)</li> </ul>                                                                                                |
| 3. Both brachial systolic blood pressures measured?                                                                            | Yes (n=44)                                   | No (n=2)                                                                                                                                                                                                                              |
| 4. Equipment used for measurement of ankle systolic pressure?                                                                  | Sphygmomanometer & Doppler Ultrasound (n=44) | None (n=0)                                                                                                                                                                                                                            |
| 5. Number of pulses assess on each foot/ankle?                                                                                 | More than one (n=42)                         | One (n=2)                                                                                                                                                                                                                             |
| 6. Calculates the ABI by dividing the higher of the ankle systolic pressures by the higher of the brachial systolic pressures? | Yes (n=37)                                   | No (n=5)<br>Variations:<br><ul style="list-style-type: none"> <li>Divides the lower ankle pressure by the lower brachial pressure (n=3)</li> <li>Divides the average ankle pressure by the average brachial pressure (n=2)</li> </ul> |

## RESULTS

- 39% (37/95) of responding general practices are utilising correct method of ABI measurement and/or calculation according to current guidelines.
- 28% (27/95) of responding general practices are utilising incorrect method of ABI measurement and/or calculation according to current guidelines.
- 27% (26/95) of responding general practices do not undertake ABI measurements. (Incomplete data for 5.3%)
